# Supplementary material
Source: PubMed Central journal article supplement (PMC1413655)

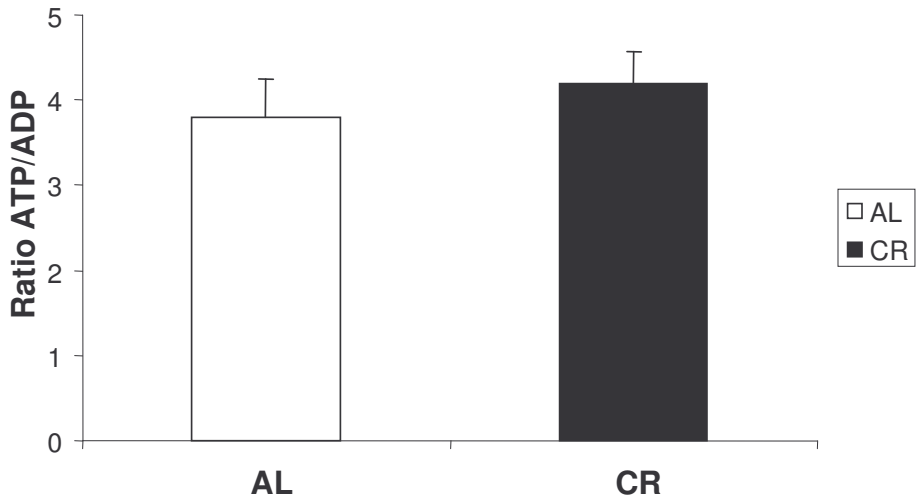

Supplement: pnas_0510452103_1.pdf [file pnas_0510452103_1.pdf]

**SirT1 RNA Interference HeLa**

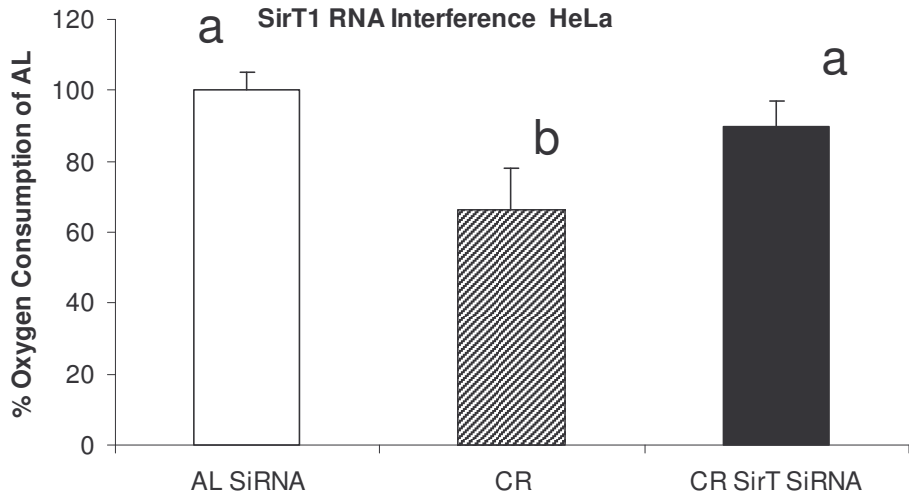

**PGC1 RNA Interference HeLa**

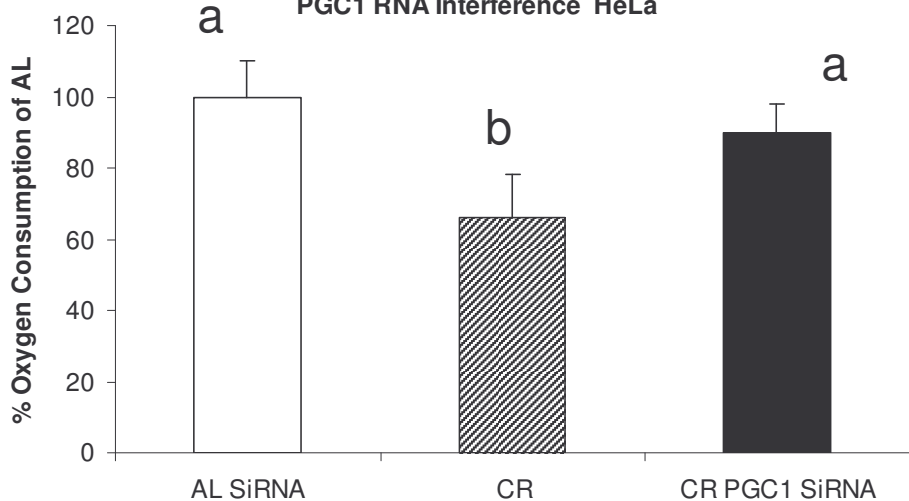

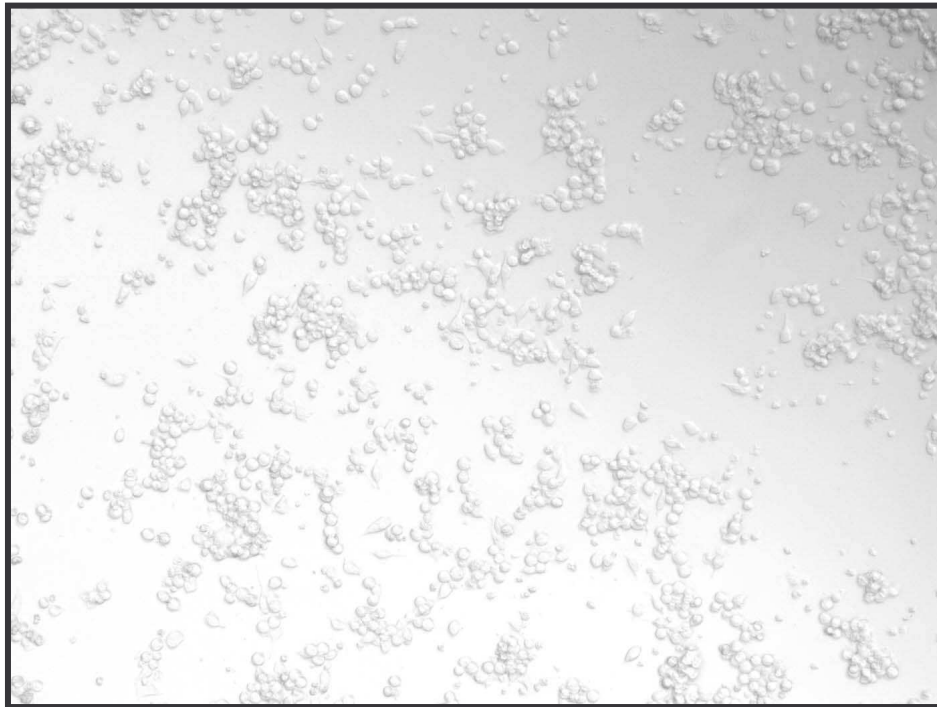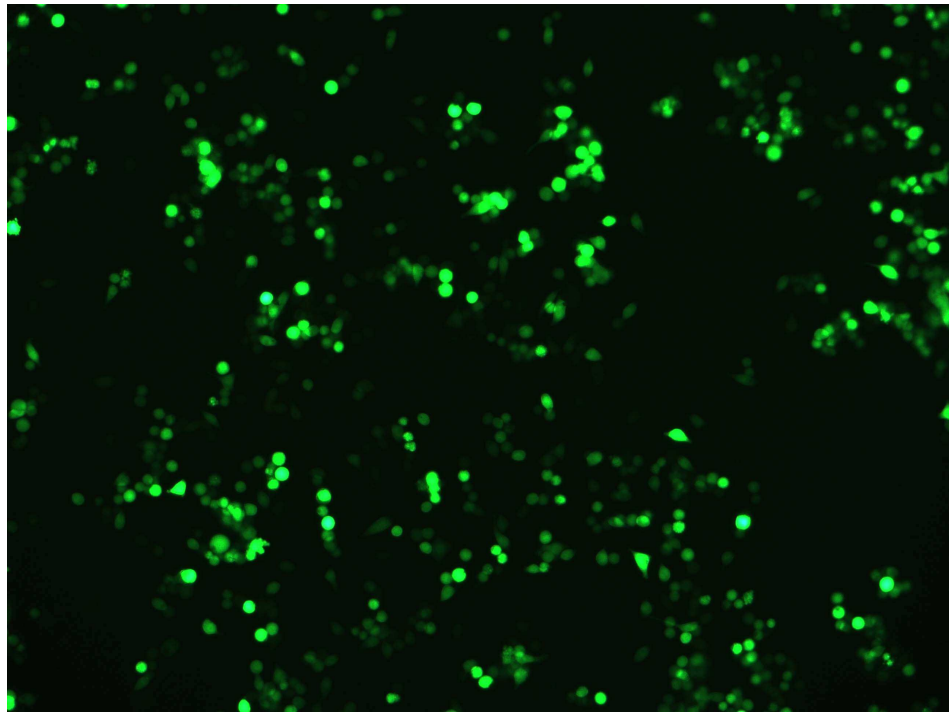

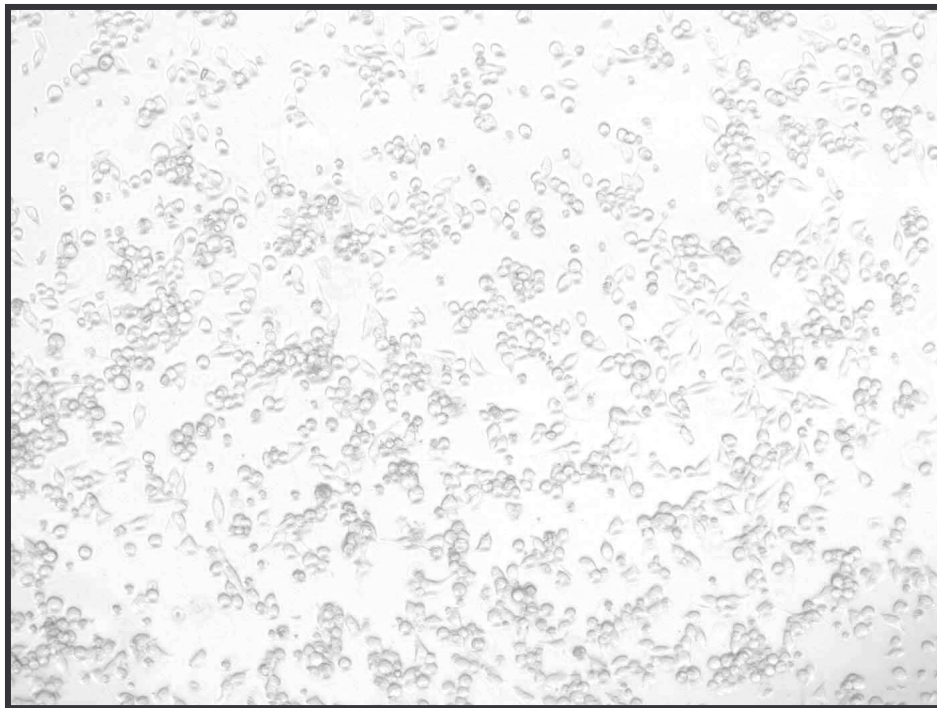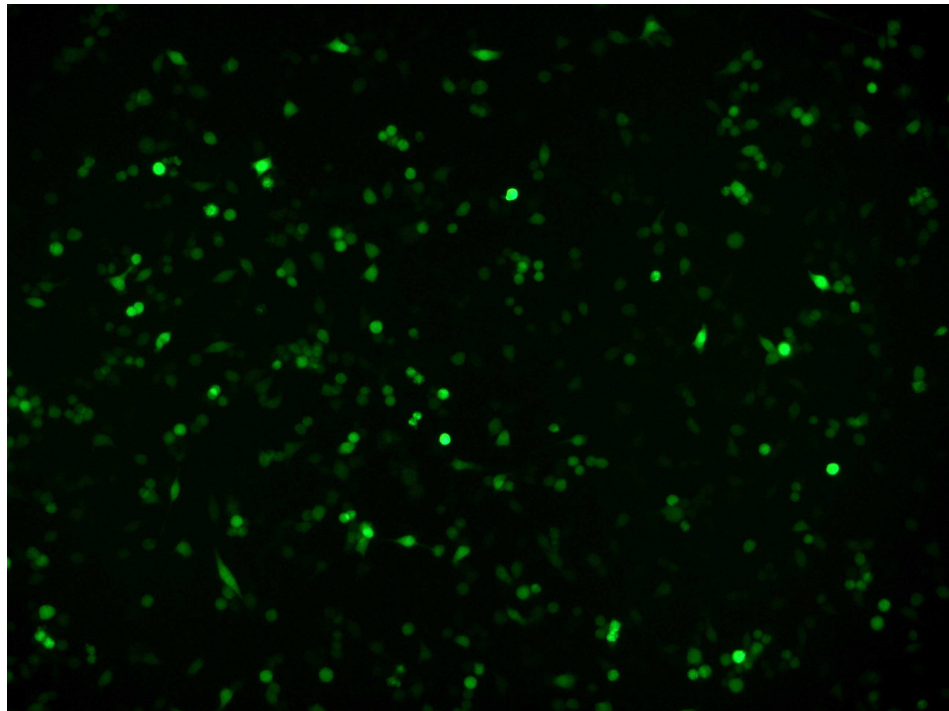

Supplement: pnas_0510452103_2.pdf [file pnas_0510452103_2.pdf]
